# Supplementary material for: Effect of Correlated tRNA Abundances on Translation Errors and Evolution of Codon Usage Bias
Source: PLOS journal article supplement (doi:10.1371/journal.pgen.1001128), 2010-09-16
Supplement: S8 (10.1371/journal.pgen.1001128.s008) [file journal.pgen.1001128.s008]

## A Estimating probability of elongation at a codon during one tRNA insertion attempt

The kinetic model of tRNA selection as adapted from Gromadski and Rodnina (2004)

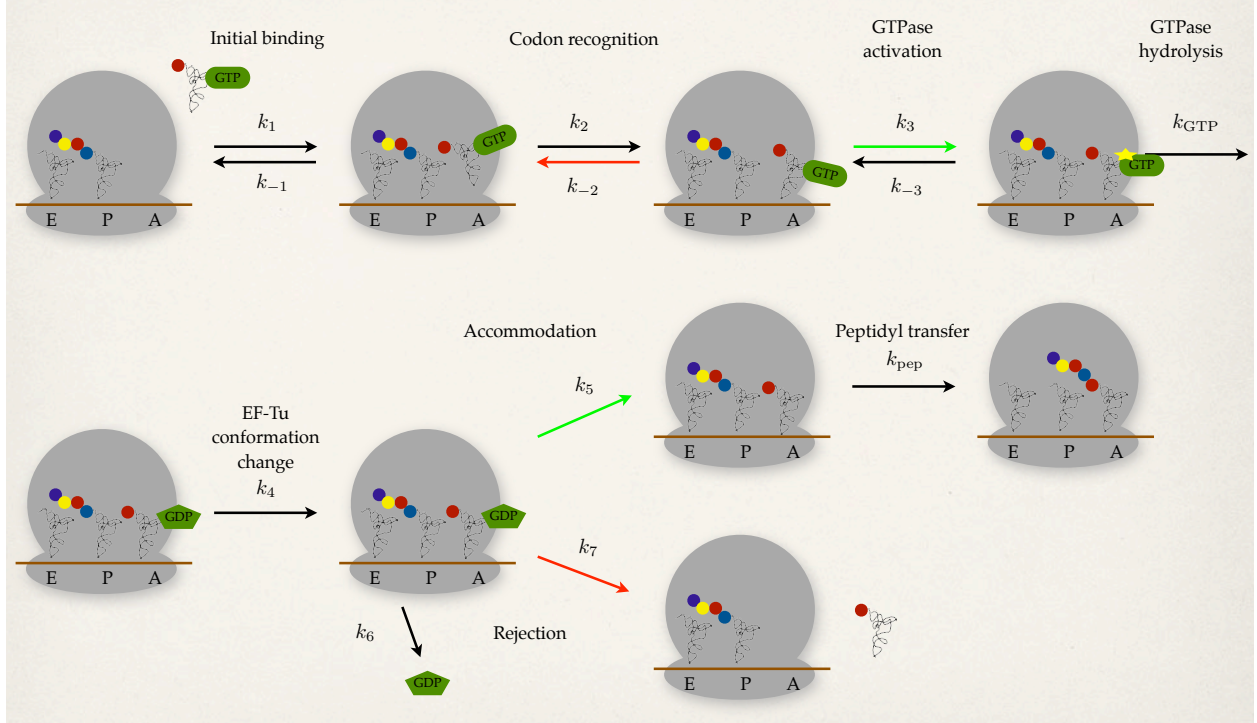

| Rate Constant       | $k_1$ ( $\mu\text{m}^{-1} \text{s}^{-1}$ ) | $k_{-1}$ ( $\text{s}^{-1}$ ) | $k_2$ ( $\text{s}^{-1}$ ) | $k_{-2}$ ( $\text{s}^{-1}$ ) | $k_3$ ( $\text{s}^{-1}$ ) | $k_{\text{GTP}}$ ( $\text{s}^{-1}$ ) | $k_4$ ( $\text{s}^{-1}$ ) | $k_5$ ( $\text{s}^{-1}$ ) | $k_7$ ( $\text{s}^{-1}$ ) | $k_{\text{pep}}$ ( $\text{s}^{-1}$ ) |
|---------------------|--------------------------------------------|------------------------------|---------------------------|------------------------------|---------------------------|--------------------------------------|---------------------------|---------------------------|---------------------------|--------------------------------------|
| <b>Cognate</b>      | 140                                        | 85                           | 190                       | 0.23                         | 260                       | 1000                                 | 1000                      | 1000                      | 60                        | 200                                  |
| <b>Near-cognate</b> | 140                                        | 85                           | 190                       | 80                           | 0.4                       | 1000                                 | 1000                      | 60                        | 1000                      | 200                                  |

Using Eqn. (5) from Fluitt, et.al. (2007), we estimated the probability of elongation as

$$p = \frac{P_{23}P_{34}P_{67}}{P_{23}P_{34} + P_{21}} \quad (1)$$

$$P_{23} = \frac{k_2}{k_2 + k_{-1}} \quad P_{34} = \frac{k_3}{k_3 + k_{-2}} \quad P_{67} = \frac{k_5}{k_5 + k_7} \quad P_{21} = \frac{k_{-1}}{k_{-1} + k_2} \quad (2)$$

Plugging in the values for cognate and near-cognate tRNAs, we find  $p_c = 6.52 \times 10^{-1}$  and  $p_n = 6.2 \times 10^{-4}$ .

## B Parameter Sensitivity

Since our model was parametrized using empirical data for *E. coli*, we checked for the sensitivity of our analyses to changes in underlying parameters. Specifically, we changed the wobble parameters ( $w_{RR}$  and  $w_{RY}$ ) and the rate of premature termination ( $R_d$ ). We checked for the sensitivity to parameters by visually comparing the correlation of error rates ( $\varepsilon_M$  and  $\varepsilon_N$ ) versus cognate elongation rate ( $R_c$ ) as well as by comparing the distribution of these correlations across amino acids both intra- and inter-specifically.

**Cognate elongation rate versus error rates** We find no qualitative difference in the relationship between cognate elongation and error rates when the rate of premature termination ( $R_d$ ) was both increased and decreased by an order of magnitude. However, we did see a corresponding change in the overall nonsense error rate of codons, as expected.

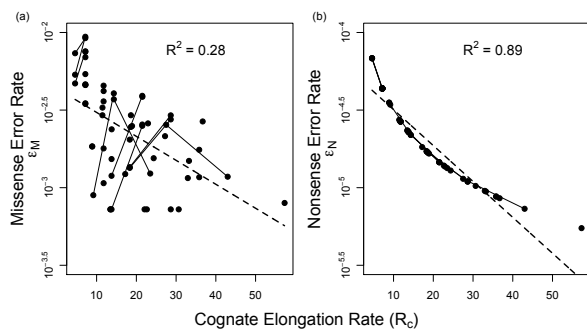

(a)  $R_d = 3.146 \times 10^{-4}$

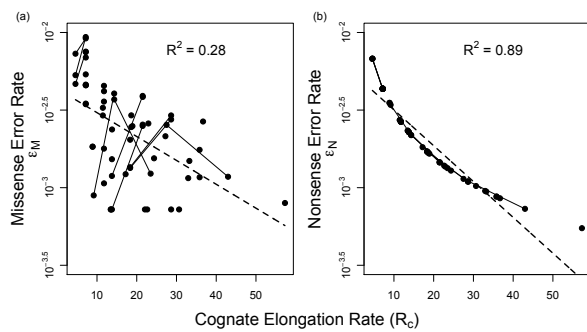

(b)  $R_d = 3.146 \times 10^{-2}$

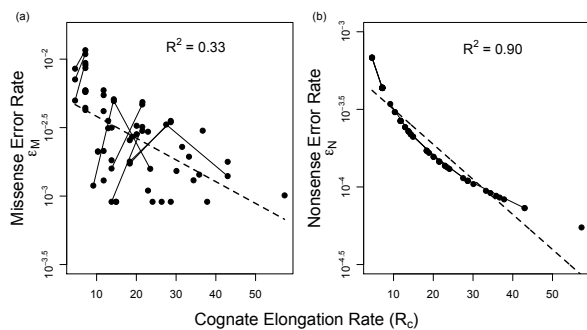

(c)  $w_{RR} = 0.8, w_{RY} = 0.64$

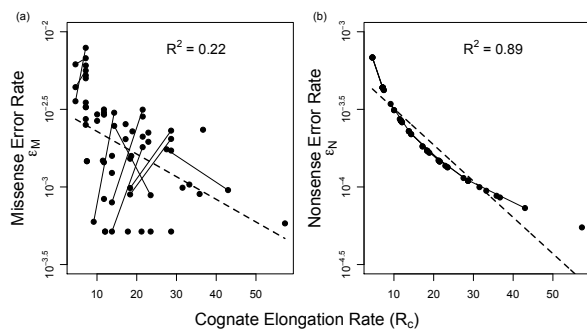

(d)  $w_{RR} = 0.4, w_{RY} = 0.64$

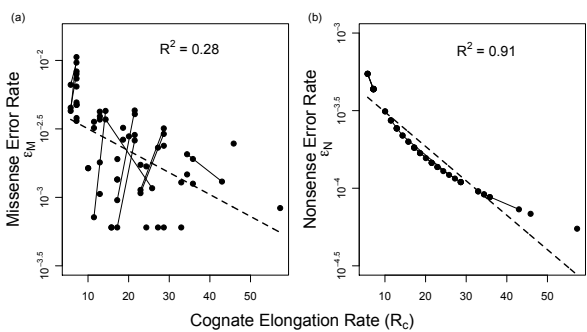

(e)  $w_{RR} = 0.6, w_{RY} = 0.8$

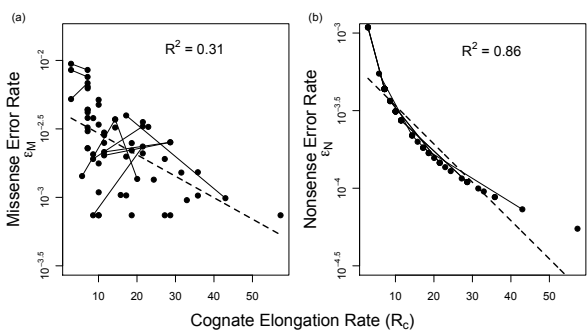

(f)  $w_{RR} = 0.6, w_{RY} = 0.4$
